# Supplementary material
Source: PubMed Central journal article supplement (PMC2943865)
Supplement: NIHMS213167-supplement-Sensitivity_analyses.pdf [file NIHMS213167-supplement-Sensitivity_analyses.pdf]

**eTable 1. Comparison of primary models and sensitivity analyses of the difference in follow-up cognitive scores, by hospitalization status \***

|                                                                                                                                                                                                                                                                                    | <i>Visit Status</i>           |                                                |                                            |
|------------------------------------------------------------------------------------------------------------------------------------------------------------------------------------------------------------------------------------------------------------------------------------|-------------------------------|------------------------------------------------|--------------------------------------------|
|                                                                                                                                                                                                                                                                                    | Not following hospitalization | Following non-critical illness hospitalization | Following critical illness hospitalization |
| <b>PRIMARY MODEL:</b> Adjusted <sup>†</sup> difference in follow-up CASI (95% CI, p-value)                                                                                                                                                                                         | Referent                      | -0.85<br>(-1.13 to -0.56, p<0.001)             | --1.39<br>(-2.72 to -0.07, p=0.04)         |
| <b>SENSITIVITY ANALYSIS#:</b> Adjusted difference in follow-up CASI                                                                                                                                                                                                                | Referent                      | -0.86<br>(-1.13 to -0.57, p<0.001)             | -1.37<br>(-2.68 to -0.06, p=0.040)         |
| <b>PRIMARY MODEL:</b> Adjusted <sup>†</sup> difference in follow-up CASI IRT (95% CI, p-value)                                                                                                                                                                                     | Referent                      | -0.11<br>(-0.15 to -0.08, p<0.001)             | -0.15<br>(-0.32 to 0.009, p=0.63)          |
| <b>SENSITIVITY ANALYSIS#:</b> Adjusted difference in follow-up CASI (95% CI, p-value)                                                                                                                                                                                              |                               | -0.11<br>(-0.15 to -0.08, p<0.001)             | -0.16<br>(-0.32 to 0.006, p=0.61)          |
| * Linear regression with GEE to account for repeated observations, specifying an exchangeable correlation matrix and robust variance estimates; note that these analyses include 49 fewer individuals and 212 fewer observations than analyses in Table 3, because of missing data |                               |                                                |                                            |
| <sup>†</sup> Adjusted for age at study visit, sex, baseline cognitive score, years of education, time since baseline visit, and the baseline comorbidities CHD and CVD.                                                                                                            |                               |                                                |                                            |
| # adjusted for the above covariates plus race/ethnicity, smoking status, and additional baseline comorbidities                                                                                                                                                                     |                               |                                                |                                            |

**eTable2. Comparison of primary models and sensitivity analysis of the risk of incident dementia by hospitalization status \***

|                                                                                                                                                                                                                                           | <i>Hospitalization Status</i>             |                                                    |                                                      |
|-------------------------------------------------------------------------------------------------------------------------------------------------------------------------------------------------------------------------------------------|-------------------------------------------|----------------------------------------------------|------------------------------------------------------|
|                                                                                                                                                                                                                                           | No hospitalizations during study (n=1601) | One or more non-critical hospitalizations (n=1287) | One or more critical illness hospitalizations (n=41) |
| <b>PRIMARY MODEL:</b> Adjusted risk of incident dementia, hazard ratio (95% CI, p-value)                                                                                                                                                  | Referent                                  | 1.4 (1.1 to 1.8, P=0.002)                          | 2.0 (0.7 to 6.0, p=0.204)                            |
| <b>SENSITIVITY MODEL:</b> Adjusted risk of incident dementia, hazard ratio (95% CI, p-value)                                                                                                                                              | Referent                                  | 1.3 (1.1 to 1.7, p=0.005)                          | 1.9 (0.7 to 5.7, p=0.234)                            |
| *Cox proportional hazards regression, with age as the time axis, left-truncated at age at study entry; note that these analyses include 49 fewer individuals and 212 fewer observations than analyses in Table 5, because of missing data |                                           |                                                    |                                                      |
| <sup>†</sup> Hazard ratios after adjusting for age at study entry, sex, baseline CASI IRT score, years of education, and baseline comorbidities of CHD and CVD, with the latter included as a time varying covariate.                     |                                           |                                                    |                                                      |
| # adjusted for the above covariates plus race/ethnicity, smoking status, and additional baseline comorbidities                                                                                                                            |                                           |                                                    |                                                      |
